# Supplementary material for: A genetic algorithm based determination of the ground and excited (1Lb) state structure and the orientation of the transition dipole moment of benzimidazole
Source: Royal Society of Chemistry journal article supplement (doi:10.1039/b512686j), 2005-11-08
Supplement: b512686j.pdf [file b512686j.pdf]

# Supplementary material

Electronic origins of the mixed isotopomers 1D2H-benzimidazole and 1H2D-benzimidazole, together with the best fit using the parameters from Table 1, main document.

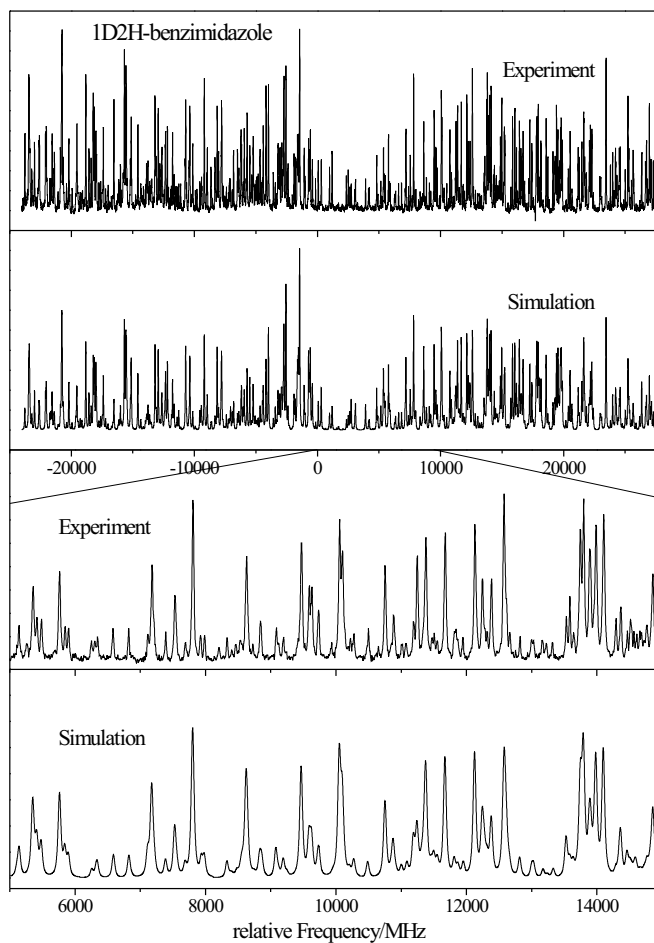

Figure S1: Rotationally resolved electronic spectrum of the origin  $\nu_0$  of 1D2H-benzimidazole at  $36028.46 \text{ cm}^{-1}$  along with the simulation using the best parameters given in Table 1, main document.

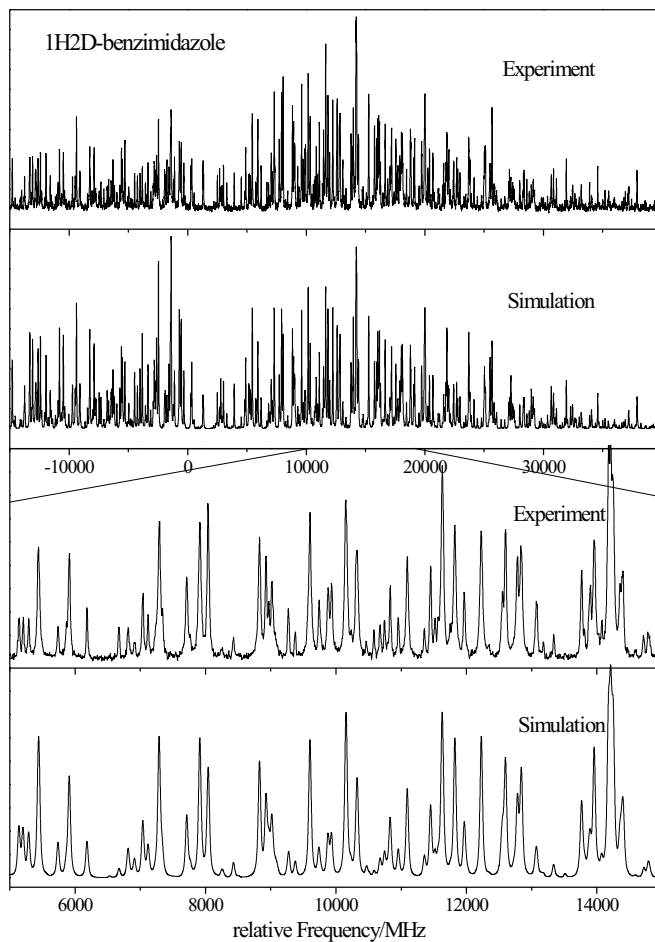

Figure S2: Rotationally resolved electronic spectrum of the origin  $\nu_0$  at of 1H2D-benzimidazole at  $36045.56 \text{ cm}^{-1}$  along with the simulation using the best parameters given in Table 1, main document.
